# Supplementary material
Source: PubMed Central journal article supplement (PMC4565176)

## Appendix 1: Flow chart depicting creation of cohort

### Deliveries

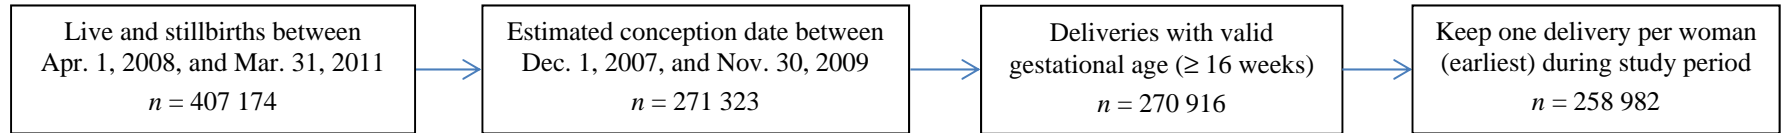

### Abortions among women without a delivery during the study period

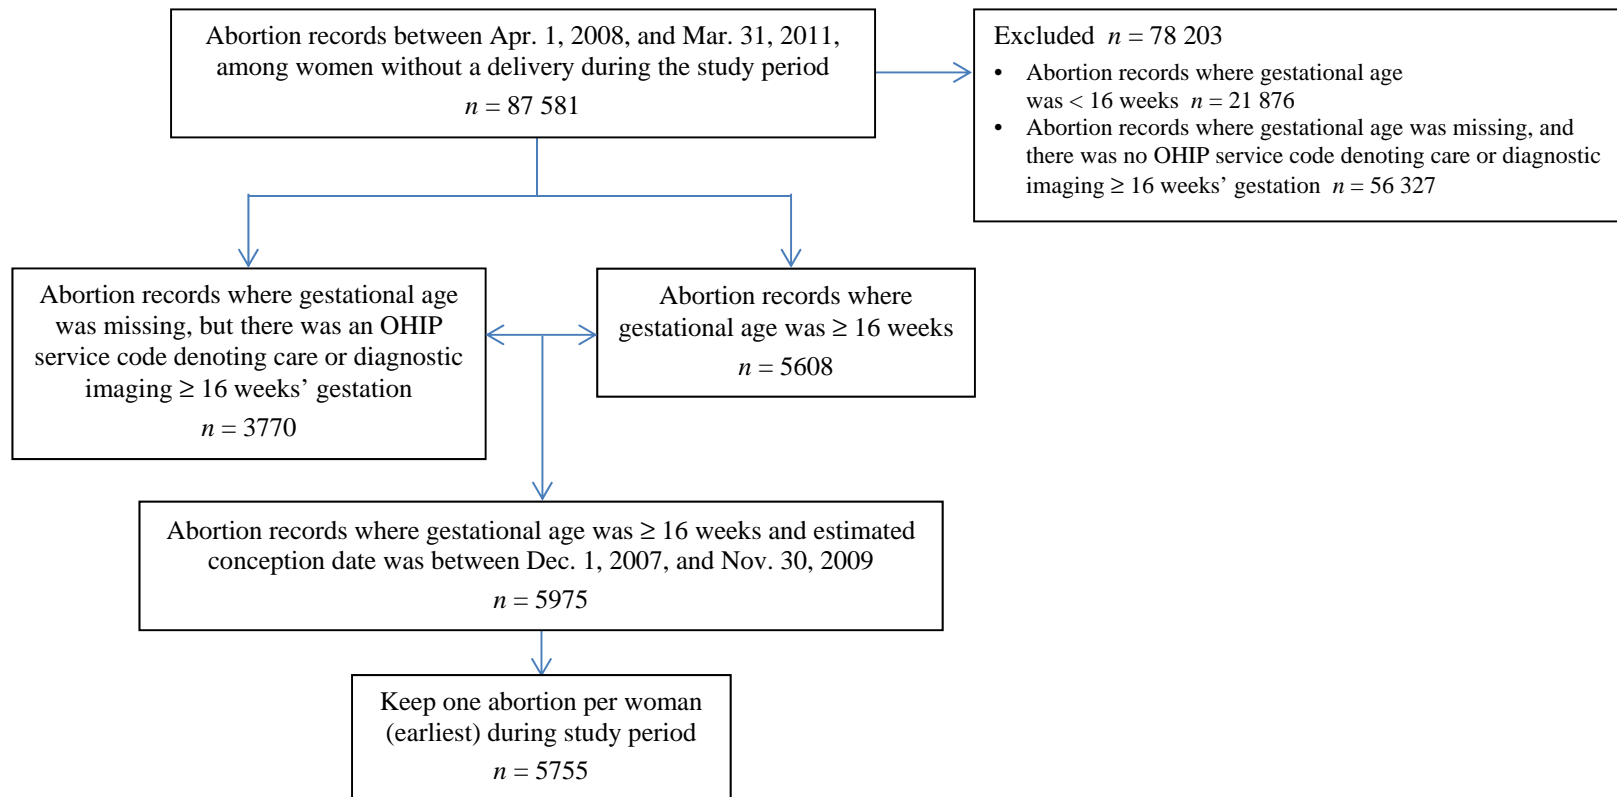

Supplement: supp_3.2.E236_2014-0110-1-at.pdf [file supp_3.2.E236_2014-0110-1-at.pdf]
